# Supplementary material for: Radical cation (C˙+–π) and radical anion (A˙−–π) interactions with aromatic rings: energetic, orbitalic and spin density considerations
Source: Royal Society of Chemistry journal article supplement (doi:10.1039/c1cp21685f), 2011-01-01
Supplement: c1cp21685f.pdf [file c1cp21685f.pdf]

# Supporting Information

## Radical cation ( $C^+-\pi$ ) and radical anion ( $A^--\pi$ ) interactions with aromatic rings: Energetic, Orbitalic and Spin density considerations.

Carolina Estarellas, Antonio Frontera\*, David Quiñonero, Pere M. Deyà.

Departament de Química, Universitat de les Illes Balears, 07122, Palma de Mallorca, Spain.

### Cartesian Coordinates

#### 1

Energy = -287.2939055071

|   |            |            |            |
|---|------------|------------|------------|
| N | -0.0000001 | -0.0000044 | 2.3345594  |
| H | -0.0000001 | 0.9556900  | 1.9542973  |
| H | -0.8276566 | -0.4778521 | 1.9543004  |
| H | 0.8276562  | -0.4778522 | 1.9543004  |
| C | 0.0000000  | 1.4121170  | -0.5570802 |
| C | 1.2231311  | 0.7061769  | -0.5578585 |
| C | 1.2229273  | -0.7060555 | -0.5570811 |
| C | 0.0000001  | -1.4123497 | -0.5578471 |
| C | -1.2229271 | -0.7060554 | -0.5570823 |
| C | -1.2231311 | 0.7061770  | -0.5578572 |
| H | 0.0000001  | 2.5058880  | -0.5968166 |
| H | 2.1703601  | 1.2530598  | -0.5924545 |
| H | 2.1701608  | -1.2529410 | -0.5968131 |
| H | 0.0000001  | -2.5061168 | -0.5924407 |
| H | -2.1701606 | -1.2529410 | -0.5968140 |
| H | -2.1703601 | 1.2530599  | -0.5924528 |
| H | -0.0000001 | -0.0000003 | 3.3585430  |

#### 2

Energy = -307.0720724348

|   |            |            |            |
|---|------------|------------|------------|
| H | -0.4477006 | 0.7754402  | -1.7132581 |
| H | -0.4477006 | -0.7754402 | -1.7132581 |
| H | 0.8954012  | 0.0000000  | -1.7132581 |
| C | -1.4143230 | 0.0000000  | 0.5894983  |
| C | -0.7071889 | -1.2248871 | 0.5871480  |
| C | 0.7071615  | -1.2248396 | 0.5894983  |
| C | 1.4143778  | 0.0000000  | 0.5871480  |
| C | 0.7071615  | 1.2248396  | 0.5894983  |
| C | -0.7071889 | 1.2248871  | 0.5871480  |
| H | -2.5081509 | 0.0000000  | 0.6221825  |
| H | -1.2540188 | -2.1720243 | 0.6284945  |
| H | 1.2540755  | -2.1721224 | 0.6221825  |
| H | 2.5080376  | 0.0000000  | 0.6284945  |
| H | 1.2540755  | 2.1721224  | 0.6221825  |
| H | -1.2540188 | 2.1720243  | 0.6284945  |
| O | 0.0000000  | 0.0000000  | -2.1421956 |

#### 3

16

Energy = -287.5912180356

|   |            |            |           |
|---|------------|------------|-----------|
| N | 0.0000000  | 0.0000000  | 2.2120000 |
| H | 0.0000000  | 0.9556900  | 1.9542973 |
| H | -0.8276566 | -0.4778521 | 1.9543004 |

|   |            |            |            |
|---|------------|------------|------------|
| H | 0.8276562  | -0.4778522 | 1.9543004  |
| C | 0.0000000  | 1.4121170  | -0.5570802 |
| C | 1.2231311  | 0.7061769  | -0.5578585 |
| C | 1.2229273  | -0.7060555 | -0.5570811 |
| C | 0.0000000  | -1.4123497 | -0.5578471 |
| C | -1.2229271 | -0.7060554 | -0.5570823 |
| C | -1.2231311 | 0.7061770  | -0.5578572 |
| H | 0.0000000  | 2.5058880  | -0.5968166 |
| H | 2.1703601  | 1.2530598  | -0.5924545 |
| H | 2.1701608  | -1.2529410 | -0.5968131 |
| H | 0.0000000  | -2.5061168 | -0.5924407 |
| H | -2.1701606 | -1.2529410 | -0.5968140 |
| H | -2.1703601 | 1.2530599  | -0.5924528 |

#### 4

Energy = -306.3152968826

|   |            |            |            |
|---|------------|------------|------------|
| H | 0.0000000  | 0.7656524  | -2.2144860 |
| H | 0.0000000  | -0.7656524 | -2.2144860 |
| C | -1.2447137 | -0.7273600 | 0.6013632  |
| C | 0.0000000  | -1.3371528 | 0.6048583  |
| C | 1.2447137  | -0.7273600 | 0.6013632  |
| C | 1.2447137  | 0.7273600  | 0.6013632  |
| C | 0.0000000  | 1.3371528  | 0.6048583  |
| C | -1.2447137 | 0.7273600  | 0.6013632  |
| H | -2.2256953 | -1.2183411 | 0.5937980  |
| H | 0.0000000  | -2.4620814 | 0.6206193  |
| H | 2.2256953  | -1.2183411 | 0.5937980  |
| H | 2.2256953  | 1.2183411  | 0.5937980  |
| H | 0.0000000  | 2.4620814  | 0.6206193  |
| H | -2.2256953 | 1.2183411  | 0.5937980  |
| O | 0.0000000  | 0.0000000  | -2.8026282 |

#### 5

Energy = -286.6556002684

|   |            |            |            |
|---|------------|------------|------------|
| N | -2.0220944 | -0.9350632 | 0.0000000  |
| H | -2.2065026 | -1.5358075 | 0.8074999  |
| H | -2.7935972 | -0.2633696 | 0.0000000  |
| H | -2.2065026 | -1.5358075 | -0.8074999 |
| C | 1.0726023  | -0.3065466 | 1.1952534  |
| C | 1.3803277  | -0.9535247 | 0.0000000  |
| C | 1.0726023  | -0.3065466 | -1.1952534 |
| C | 0.4610439  | 1.0161989  | -1.1952957 |
| C | 0.1673743  | 1.6696291  | 0.0000000  |
| C | 0.4610439  | 1.0161989  | 1.1952957  |
| H | 1.2887505  | -0.7806978 | 2.1569567  |
| H | 1.8432571  | -1.9418480 | 0.0000000  |
| H | 1.2887505  | -0.7806978 | -2.1569567 |
| H | 0.2391240  | 1.4875916  | -2.1570289 |
| H | -0.2853037 | 2.6626993  | 0.0000000  |
| H | 0.2391240  | 1.4875916  | 2.1570289  |

#### 6

Energy = -306.3300088843

|   |            |            |            |
|---|------------|------------|------------|
| H | 0.0000000  | 0.7560482  | -2.8415005 |
| H | 0.0000000  | -0.7560482 | -2.8415005 |
| C | -1.1802512 | -0.6851237 | 0.6593123  |
| C | 0.0000000  | -1.4824130 | 0.6608245  |
| C | 1.1802512  | -0.6851237 | 0.6593123  |
| C | 1.1802512  | 0.6851237  | 0.6593123  |
| C | 0.0000000  | 1.4824130  | 0.6608245  |
| C | -1.1802512 | 0.6851237  | 0.6593123  |

|   |            |            |            |
|---|------------|------------|------------|
| H | -2.1105929 | -1.2957629 | 0.6570685  |
| H | 0.0000000  | -2.5726452 | 0.6663179  |
| H | 2.1105929  | -1.2957629 | 0.6570685  |
| H | 2.1105929  | 1.2957629  | 0.6570685  |
| H | 0.0000000  | 2.5726452  | 0.6663179  |
| H | -2.1105929 | 1.2957629  | 0.6570685  |
| O | 0.0000000  | 0.0000000  | -2.2368071 |

## 7

Energy = -938.3043398807

|   |            |            |            |
|---|------------|------------|------------|
| C | -0.0000005 | -0.0000060 | -3.4964048 |
| H | -0.0000001 | 1.0286241  | -3.9660998 |
| H | 0.8908348  | -0.5143460 | -3.9660462 |
| O | -0.0000017 | 0.0000459  | -2.1258128 |
| H | -0.8908351 | -0.5143459 | -3.9660476 |
| C | -1.2084701 | 0.6977197  | 0.4518082  |
| C | -0.0000080 | 1.3955800  | 0.4521956  |
| C | 1.2084817  | 0.6977154  | 0.4518080  |
| C | 1.2086050  | -0.6977854 | 0.4522050  |
| C | 0.0000055  | -1.3954415 | 0.4518428  |
| C | -1.2086122 | -0.6977850 | 0.4522046  |
| F | -2.3809777 | 1.3746625  | 0.4155694  |
| F | 0.0000004  | 2.7494474  | 0.4155251  |
| F | 2.3809766  | 1.3746617  | 0.4155708  |
| F | 2.3810942  | -1.3747194 | 0.4154408  |
| F | 0.0000001  | -2.7493083 | 0.4155528  |
| F | -2.3810929 | -1.3747191 | 0.4154396  |

## 8

Energy = -1261.018262844

|   |            |            |            |
|---|------------|------------|------------|
| C | -0.6988042 | 1.2103644  | 1.4118861  |
| C | -1.3976152 | 0.0000000  | 1.4119228  |
| C | -0.6988042 | -1.2103644 | 1.4118861  |
| C | 0.6988076  | -1.2103703 | 1.4119228  |
| C | 1.3976084  | 0.0000000  | 1.4118861  |
| C | 0.6988076  | 1.2103703  | 1.4119228  |
| F | -1.3743041 | 2.3803645  | 1.3930062  |
| F | -2.7486392 | 0.0000000  | 1.3927873  |
| F | -1.3743041 | -2.3803645 | 1.3930062  |
| F | 1.3743196  | -2.3803914 | 1.3927873  |
| F | 2.7486082  | 0.0000000  | 1.3930062  |
| F | 1.3743196  | 2.3803914  | 1.3927873  |
| C | 0.0000000  | 0.0000000  | -3.4915352 |
| H | 0.5144503  | 0.8910541  | -3.8958091 |
| H | -1.0289007 | 0.0000000  | -3.8958091 |
| H | 0.5144503  | -0.8910541 | -3.8958091 |
| S | 0.0000000  | 0.0000000  | -1.6498444 |

## 9

Energy = -937.7032409925

|   |            |            |           |
|---|------------|------------|-----------|
| C | 0.6982607  | 1.2091983  | 0.9768784 |
| C | 1.3963602  | 0.0000000  | 0.9783600 |
| C | 0.6982607  | -1.2091983 | 0.9768784 |
| C | -0.6982607 | -1.2091983 | 0.9768784 |
| C | -1.3963602 | 0.0000000  | 0.9783600 |
| C | -0.6982607 | 1.2091983  | 0.9768784 |
| F | 1.3747958  | -2.3807022 | 0.9527939 |
| F | 2.7492311  | 0.0000000  | 0.9530083 |
| F | 1.3747958  | 2.3807022  | 0.9527939 |
| F | -1.3747958 | 2.3807022  | 0.9527939 |
| F | -2.7492311 | 0.0000000  | 0.9530083 |

|   |            |            |            |
|---|------------|------------|------------|
| F | -1.3747958 | -2.3807022 | 0.9527939  |
| C | 0.0000000  | 0.0000000  | -2.9313041 |
| H | -0.9423412 | 0.0000000  | -3.5135441 |
| O | 0.0000000  | 0.0000000  | -1.6230337 |
| H | 0.9423412  | 0.0000000  | -3.5135441 |

## 10

Energy = -1260.404890571

|   |            |            |            |
|---|------------|------------|------------|
| C | 0.6990393  | 1.2105087  | 1.1705633  |
| C | 1.3980984  | 0.0000000  | 1.1710849  |
| C | 0.6990393  | -1.2105087 | 1.1705633  |
| C | -0.6990393 | -1.2105087 | 1.1705633  |
| C | -1.3980984 | 0.0000000  | 1.1710849  |
| C | -0.6990393 | 1.2105087  | 1.1705633  |
| F | 1.3742038  | -2.3802380 | 1.1548058  |
| F | 2.7484670  | 0.0000000  | 1.1546737  |
| F | 1.3742038  | 2.3802380  | 1.1548058  |
| F | -1.3742038 | 2.3802380  | 1.1548058  |
| F | -2.7484670 | 0.0000000  | 1.1546737  |
| F | -1.3742038 | -2.3802380 | 1.1548058  |
| C | 0.0000000  | 0.0000000  | -3.6343377 |
| H | -0.9366168 | 0.0000000  | -4.2029388 |
| H | 0.9366168  | 0.0000000  | -4.2029388 |
| S | 0.0000000  | 0.0000000  | -1.9127780 |

## 11

Energy = -1013.380638128

|   |            |            |            |
|---|------------|------------|------------|
| C | 0.0000000  | 0.0000000  | -2.4444846 |
| C | 0.0000000  | -0.7416491 | -3.6603624 |
| C | 0.0000000  | 0.7416491  | -3.6603624 |
| H | 0.0000000  | 1.6524190  | -4.2484213 |
| H | 0.0000000  | -1.6524190 | -4.2484213 |
| O | 0.0000000  | 0.0000000  | -1.1848991 |
| C | -1.2163079 | -0.7019568 | 1.6065064  |
| C | 0.0000000  | -1.4045143 | 1.6177854  |
| C | 1.2163079  | -0.7019568 | 1.6065064  |
| C | 1.2163079  | 0.7019568  | 1.6065064  |
| C | 0.0000000  | 1.4045143  | 1.6177854  |
| C | -1.2163079 | 0.7019568  | 1.6065064  |
| F | 0.0000000  | -2.7577116 | 1.6210247  |
| F | -2.3891406 | -1.3780071 | 1.6358263  |
| F | -2.3891406 | 1.3780071  | 1.6358263  |
| F | 2.3891406  | 1.3780071  | 1.6358263  |
| F | 2.3891406  | -1.3780071 | 1.6358263  |
| F | 0.0000000  | 2.7577116  | 1.6210247  |

## 12

Energy = -1336.057160646

|   |            |            |            |
|---|------------|------------|------------|
| C | 0.0000000  | 0.0000000  | -2.9476384 |
| C | 0.0000000  | -0.7357190 | -4.1411532 |
| C | 0.0000000  | 0.7357190  | -4.1411532 |
| H | 0.0000000  | 1.6898914  | -4.6555882 |
| H | 0.0000000  | -1.6898914 | -4.6555882 |
| C | -1.2108518 | -0.6994249 | 1.8224935  |
| C | 0.0000000  | -1.3990807 | 1.8238604  |
| C | 1.2108518  | -0.6994249 | 1.8224935  |
| C | 1.2108518  | 0.6994249  | 1.8224935  |
| C | 0.0000000  | 1.3990807  | 1.8238604  |
| C | -1.2108518 | 0.6994249  | 1.8224935  |
| F | 0.0000000  | -2.7483056 | 1.8099956  |
| F | -2.3799590 | -1.3738848 | 1.8093829  |

|   |            |            |            |
|---|------------|------------|------------|
| F | -2.3799590 | 1.3738848  | 1.8093829  |
| F | 2.3799590  | 1.3738848  | 1.8093829  |
| F | 2.3799590  | -1.3738848 | 1.8093829  |
| F | 0.0000000  | 2.7483056  | 1.8099956  |
| S | 0.0000000  | 0.0000000  | -1.2540964 |

### 13

Energy = -1090.391210941

|   |            |            |            |
|---|------------|------------|------------|
| C | -1.2094940 | -0.6985587 | 2.3312156  |
| C | -1.2094940 | 0.6985587  | 2.3312156  |
| C | 0.0000000  | 1.3971308  | 2.3326778  |
| C | 1.2094940  | 0.6985587  | 2.3312156  |
| C | 1.2094940  | -0.6985587 | 2.3312156  |
| C | 0.0000000  | -1.3971308 | 2.3326778  |
| F | 0.0000000  | 2.7491137  | 2.3105175  |
| F | -2.3805751 | 1.3744231  | 2.3104121  |
| F | -2.3805751 | -1.3744231 | 2.3104121  |
| F | 0.0000000  | -2.7491137 | 2.3105175  |
| F | 2.3805751  | -1.3744231 | 2.3104121  |
| F | 2.3805751  | 1.3744231  | 2.3104121  |
| C | 0.0000000  | 0.0000000  | -1.5674534 |
| C | 0.0000000  | 1.1742734  | -2.4533980 |
| H | 0.0000000  | 2.2085628  | -2.0985634 |
| C | 0.0000000  | 0.7325811  | -3.7766904 |
| H | 0.0000000  | 1.3596596  | -4.6739930 |
| C | 0.0000000  | -1.1742734 | -2.4533980 |
| H | 0.0000000  | -2.2085628 | -2.0985634 |
| C | 0.0000000  | -0.7325811 | -3.7766904 |
| H | 0.0000000  | -1.3596596 | -4.6739930 |
| O | 0.0000000  | 0.0000000  | -0.2801584 |

### 14

|   |            |            |            |
|---|------------|------------|------------|
| C | -1.2109925 | -0.6997600 | 2.7091974  |
| C | -1.2109925 | 0.6997600  | 2.7091974  |
| C | 0.0000000  | 1.3998373  | 2.7109170  |
| C | 1.2109925  | 0.6997600  | 2.7091974  |
| C | 1.2109925  | -0.6997600 | 2.7091974  |
| C | 0.0000000  | -1.3998373 | 2.7109170  |
| F | 0.0000000  | 2.7480639  | 2.6973458  |
| F | -2.3796617 | 1.3735367  | 2.6968364  |
| F | -2.3796617 | -1.3735367 | 2.6968364  |
| F | 0.0000000  | -2.7480639 | 2.6973458  |
| F | 2.3796617  | -1.3735367 | 2.6968364  |
| F | 2.3796617  | 1.3735367  | 2.6968364  |
| C | 0.0000000  | 0.0000000  | -2.0853283 |
| C | 0.0000000  | 1.1665763  | -2.9450081 |
| H | 0.0000000  | 2.1980459  | -2.5832774 |
| C | 0.0000000  | 0.7135119  | -4.2816874 |
| H | 0.0000000  | 1.3527414  | -5.1708252 |
| C | 0.0000000  | -1.1665763 | -2.9450081 |
| H | 0.0000000  | -2.1980459 | -2.5832774 |
| C | 0.0000000  | -0.7135119 | -4.2816874 |
| H | 0.0000000  | -1.3527414 | -5.1708252 |
| S | 0.0000000  | 0.0000000  | -0.3937364 |
